# Supplementary material
Source: HighWire-hosted journal article supplement (https://svn.smart01.highwire.org/content/10/1/71)
Supplement: inline-supplementary-material-1 [file inline-supplementary-material-1.pdf]

**Table S1. Reason for not receiving intravenous thrombolysis within 4.5 hours**

| Reasons                               | Number |
|---------------------------------------|--------|
| Refusal                               | 8      |
| Judgement by doctor                   | 5      |
| Failure to meet the indication of IVT | 41     |
| Total                                 | 54     |

IVT indicates intravenous thrombolysis.

Table S2. Definitions of the outcomes

| Outcomes                                             | Definitions                                                                                                                                                                                                                                                      |
|------------------------------------------------------|------------------------------------------------------------------------------------------------------------------------------------------------------------------------------------------------------------------------------------------------------------------|
| <b>Primary outcome</b>                               |                                                                                                                                                                                                                                                                  |
| mRS Score at 90 days                                 | Scores on the modified Rankin scale range from 0 to 6, with higher scores indicating greater disability.                                                                                                                                                         |
| <b>Secondary outcomes</b>                            |                                                                                                                                                                                                                                                                  |
| mRS Score at 90 days                                 | Scores on the modified Rankin scale range from 0 to 6, with higher scores indicating greater disability.                                                                                                                                                         |
| 0 to 2                                               |                                                                                                                                                                                                                                                                  |
| 0 to 3                                               |                                                                                                                                                                                                                                                                  |
| NIHSS 0-1 or improved                                |                                                                                                                                                                                                                                                                  |
| ≥10 points at 36 hours                               |                                                                                                                                                                                                                                                                  |
| Change from baseline in infarct-core volume          | Change in infarct-core volume was measured from baseline imaging (CT perfusion or diffusion-weighted imaging) to noncontrast CT at 7 days or at discharge (whichever is earlier) or to MRI at 36 hours.                                                          |
| Target-artery recanalization at 36 hours             | Target-artery recanalization was defined as a modified arterial occlusive lesion grade of 2 or 3, as assessed on CT angiography (CTA) or magnetic resonance angiography (MRA) at 36 hours (with a window of ±12 hours).                                          |
| <b>Safety outcomes</b>                               |                                                                                                                                                                                                                                                                  |
| Symptomatic intracranial hemorrhage within 2 days    | Symptomatic intracranial hemorrhage was defined according to the Heidelberg bleeding classification (an increase in the NIHSS score of ≥4 points or an increase in the score for an NIHSS subcategory of ≥2 points with any intracranial hemorrhage on imaging). |
| Any intracranial hemorrhage within 2 days            |                                                                                                                                                                                                                                                                  |
| Death within 90 days                                 |                                                                                                                                                                                                                                                                  |
| Decompressive hemicraniectomy during hospitalization |                                                                                                                                                                                                                                                                  |

mRS indicates modified Rankin Scale.

**Table S3. Comparison of modified Rankin Scale between endovascular therapy alone and bridging therapy**

| Outcomes                                             | Endovascular therapy<br>(n=77) | Bridging therapy<br>(n=45) | RR<br>(95% CI)  | p<br>value |
|------------------------------------------------------|--------------------------------|----------------------------|-----------------|------------|
| Score on the modified Rankin Scale at 90 days, n (%) |                                |                            |                 |            |
| 0                                                    | 3(3.9)                         | 4(8.9)                     | 2.28(0.53-9.74) | 0.38       |
| 0-1                                                  | 8(10)                          | 9(20)                      | 1.93(0.80-4.63) | 0.14       |
| 0-2                                                  | 21(27.3)                       | 16(35.6)                   | 1.30(0.76-2.23) | 0.34       |
| 0-3                                                  | 33(42.9)                       | 23(51.1)                   | 1.19(0.81-1.75) | 0.38       |
| 0-4                                                  | 46(59.7)                       | 25(55.6)                   | 0.93(0.68-1.28) | 0.65       |
| 0-5                                                  | 53(68.8)                       | 34(75.6)                   | 1.10(0.88-1.37) | 0.43       |

CI indicates confidence interval; RR indicates relative risk.

**Table S4. Comparison of outcome parameters between endovascular therapy alone and bridging therapy**

| Outcomes                                                    | Endovascular<br>therapy<br>(n=77) | Bridging<br>therapy<br>(n=45) | Treatment Effect*   |         |
|-------------------------------------------------------------|-----------------------------------|-------------------------------|---------------------|---------|
|                                                             |                                   |                               | (95%CI)             | p value |
| <b>Primary outcome</b>                                      |                                   |                               |                     |         |
| Score on the modified Rankin Scale at 90 days               | 4(2-6)                            | 3(2-5)                        | 1.55(0.78-3.08)     | 0.21    |
| <b>Secondary outcomes</b>                                   |                                   |                               |                     |         |
| Score on the modified Rankin Scale at 90 days, n (%)        |                                   |                               |                     |         |
| 0 to 2                                                      | 21(27.3)                          | 16(35.6)                      | 1.35(0.78-2.35)     | 0.29    |
| 0 to 3                                                      | 33(42.9)                          | 23(51.1)                      | 1.23(0.83-1.83)     | 0.31    |
| NIHSS 0-1 or improved ≥10 points at 36 hr, n (%)            | 6(7.8)                            | 2(4.4)                        | 0.49(0.11-2.27)     | 0.36    |
| Change from baseline in infarct-core volume, mean (SD)      | 87.4±91.3                         | 111.4±119.5                   | 24.66(-15.77-65.10) | 0.23    |
| Target-artery recanalization at 36 hr, n (%)                | 60(90.9)                          | 32(86.5)                      | 1.03(0.91-1.16)     | 0.64    |
| <b>Safety outcomes</b>                                      |                                   |                               |                     |         |
| Symptomatic intracranial hemorrhage within 2 days, n (%)    | 3(3.9)                            | 3(6.7)                        | 2.03(0.43-9.57)     | 0.37    |
| Any intracranial hemorrhage within 2 days, n (%)            | 34(44.2)                          | 23(51.1)                      | 1.31(0.91-1.90)     | 0.15    |
| Death within 90 days, n (%)                                 | 24(31.2)                          | 11(24.4)                      | 0.68(0.34-1.36)     | 0.27    |
| Decompressive hemicraniectomy during hospitalization, n (%) | 3(3.9)                            | 6(13.3)                       | 2.70(0.64-11.47)    | 0.18    |

CI indicates confidence interval; NIHSS indicates Scores on the National Institutes of Health Stroke Scale; and SD indicates standard deviation.

\* Adjusted for urokinase. Treatment effects are reported including the primary outcome as a cOR for the ordinal shift on the mRS; the safety outcome of death as a HR; the secondary outcomes of alteration in the volume of infarct core as the mean difference, and the remaining outcomes as the RR.

**Table S5. Comparison of outcome parameters between endovascular therapy alone and bridging therapy**

| Outcomes                                                    | Endovascular<br>therapy<br>(n=77) | Bridging<br>therapy<br>(n=45) | Treatment Effect <sup>**†</sup> |                |
|-------------------------------------------------------------|-----------------------------------|-------------------------------|---------------------------------|----------------|
|                                                             |                                   |                               | (95%CI)                         | <i>p</i> value |
| <b>Primary outcome</b>                                      |                                   |                               |                                 |                |
| Score on the modified Rankin Scale at 90 days               | 4(2-6)                            | 3(2-5)                        | 1.56(0.78-3.13)                 | 0.21           |
| <b>Secondary outcomes</b>                                   |                                   |                               |                                 |                |
| Score on the modified Rankin Scale at 90 days, n (%)        |                                   |                               |                                 |                |
| 0 to 2                                                      | 21(27.3)                          | 16(35.6)                      | 1.35(0.79-2.33)                 | 0.27           |
| 0 to 3                                                      | 33(42.9)                          | 23(51.1)                      | 1.03(0.72-1.48)                 | 0.86           |
| NIHSS 0-1 or improved ≥10 points at 36 hr, n (%)            | 6(7.8)                            | 2(4.4)                        | 0.49(0.11-2.27)                 | 0.36           |
| Change from baseline in infarct-core volume, mean (SD)      | 87.4±91.3                         | 111.4±119.5                   | 29.30(-10.42-69.01)             | 0.15           |
| Target-artery recanalization at 36 hr, n (%)                | 60(90.9)                          | 32(86.5)                      | 1.02(0.77-1.35)                 | 0.87           |
| <b>Safety outcomes</b>                                      |                                   |                               |                                 |                |
| Symptomatic intracranial hemorrhage within 2 days, n (%)    | 3(3.9)                            | 3(6.7)                        | 1.91(0.40-9.09)                 | 0.41           |
| Any intracranial hemorrhage within 2 days, n (%)            | 34(44.2)                          | 23(51.1)                      | 1.30(0.90-1.87)                 | 0.16           |
| Death within 90 days, n (%)                                 | 24(31.2)                          | 11(24.4)                      | 0.75(0.40-1.40)                 | 0.37           |
| Decompressive hemicraniectomy during hospitalization, n (%) | 3(3.9)                            | 6(13.3)                       | 2.59(0.60-11.05)                | 0.20           |

CI indicates confidence interval; NIHSS indicates Scores on the National Institutes of Health Stroke Scale; and SD indicates standard deviation.

\* Treatment effects are reported including the primary outcome as a cOR for the ordinal shift on the mRS; the safety outcome of death as a HR; the secondary outcomes of alteration in the volume of infarct core as the mean difference, and the remaining outcomes as the RR.

† The safety outcomes of symptomatic intracranial hemorrhage within 2 days was adjusted for hypertension and urokinase; the safety outcomes of decompressive hemicraniectomy during hospitalization was adjusted for NIHSS score at admission, hypertension, and urokinase; the remaining outcomes was adjusted for age, NIHSS score at admission, hypertension, and urokinas.
